# Supplementary material for: Fluorescence enhanced lab-on-a-chip patterned using a hybrid technique of femtosecond laser direct writing and anodized aluminum oxide porous nanostructuring
Source: Royal Society of Chemistry journal article supplement (doi:10.1039/c9na00352e), 2019-01-01
Supplement: c9na00352e1.pdf [file c9na00352e1.pdf]

## Supporting Information

# Fluorescence Enhanced Lab-on-a-chip patterned by Hybrid Technique of Femtosecond Laser Direct Writing and Anodized Aluminum Oxide Porous Nanostructuring

Zhi Yu<sup>1,3</sup>, Yuhao Lei<sup>1</sup>, Weili Yu<sup>1,3</sup>, Jun Xing<sup>1,3</sup>, Xin Zheng<sup>1,3</sup>, Zhibing Zhan<sup>2</sup>, Bin Wang<sup>1,3</sup>,  
Chunlei Guo<sup>1,2,3</sup>

1. *The Guo China-US photonics laboratory, Changchun Institute of Optics, Fine Mechanics and Physics, Chinese Academy of Sciences, Changchun, China, 130033*
2. *The Institute of Optics, University of Rochester, Rochester, NY 14627, USA*
3. *State Key Laboratory for Applied Optics, Changchun Institute of Optics, Fine Mechanics and Physics, Chinese Academy of Sciences, Changchun, China, 130033*

\*To whom correspondence should be addressed.

E-mail: guo@optics.rochester.edu

## Scheme S1

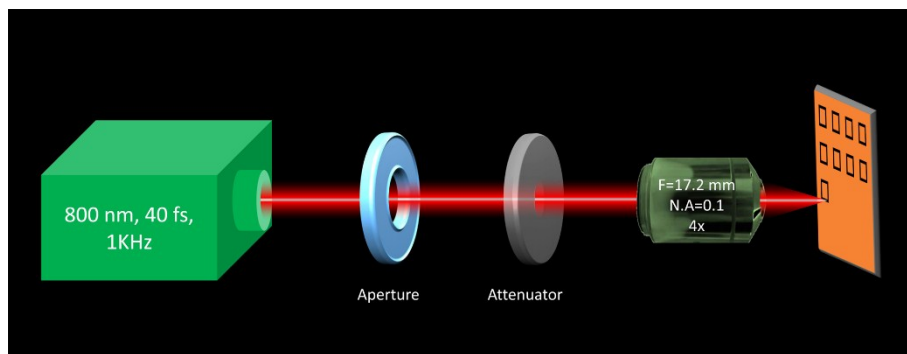

**Scheme S1.** A schematic experimental setup for femtosecond laser processing the LOC device.

**Figure S1**

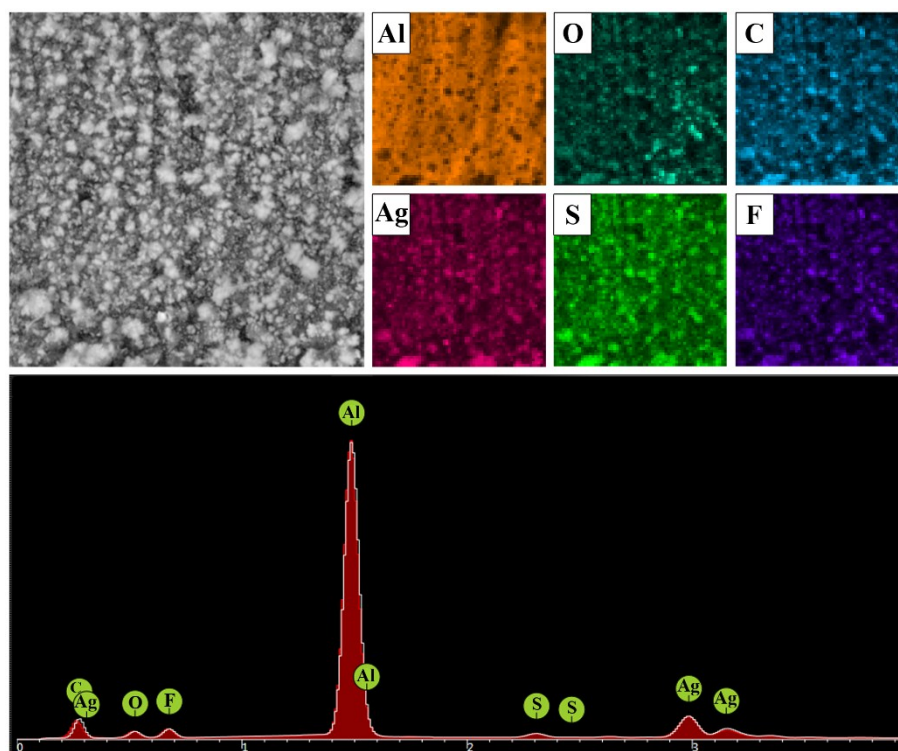

**Figure S1.** SEM and EDS analysis of the Al foil after the modification of Ag nanostructure.

**Figure S2**

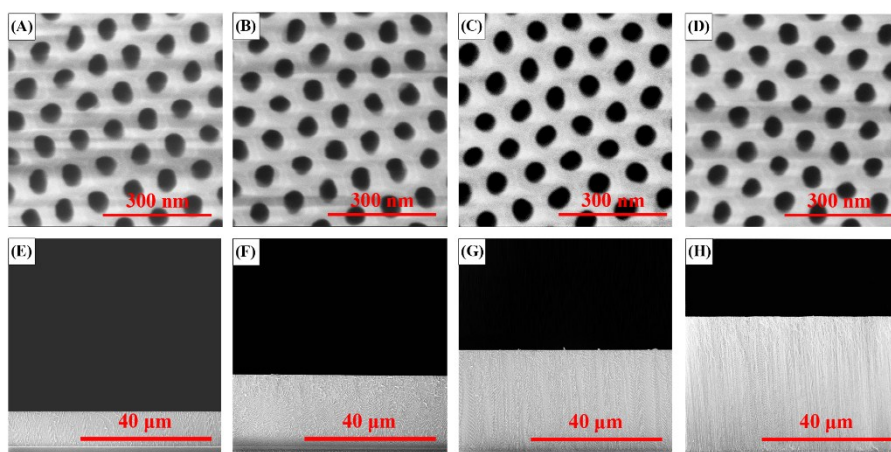

**Figure S2.** SEM characterization of the AAO platform with different anodization times (1, 2, 3, 4 h), surface morphology (A-F) and sectional view (F-H).

**Figure S3**

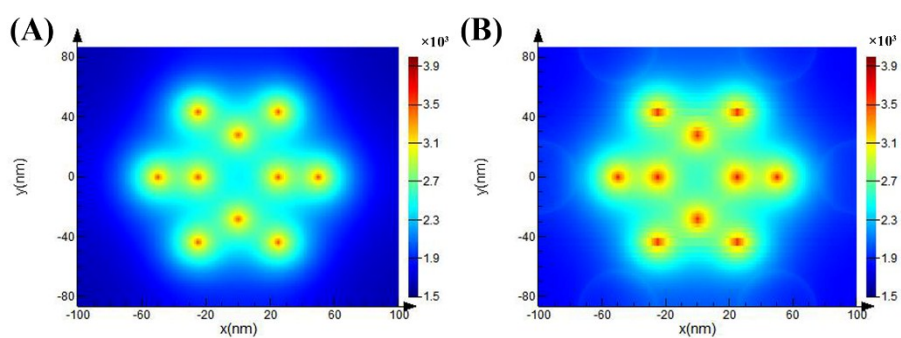

**Figure S3.** The Simulated electromagnetic field distribution for an excited dye molecule at its maximum emission 548 nm adsorbed on Al (A) and AAO surface at different positions.

**Figure S4**

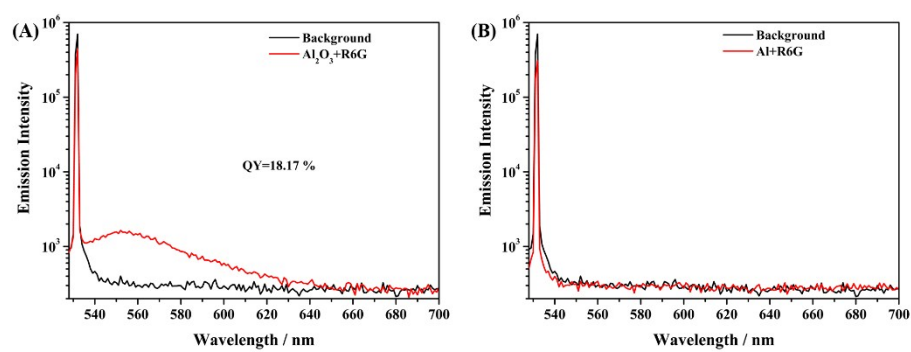

**Figure S4.** The emission spectra of  $\text{Al}_2\text{O}_3+\text{R6G}$  (A) and  $\text{Al}+\text{R6G}$  (B) compared with background.

**Figure S5**

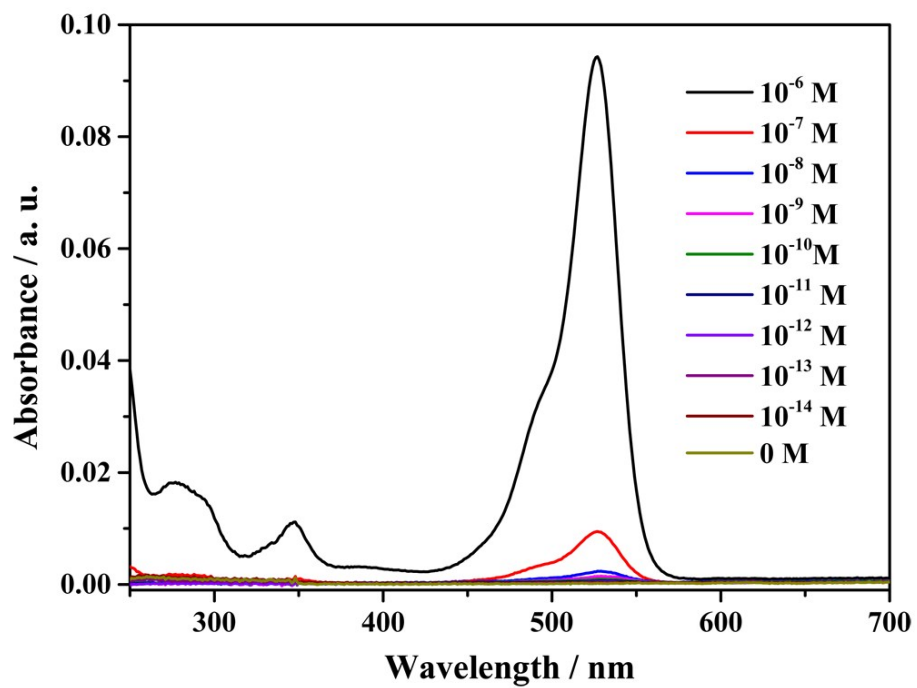

**Figure S5.** The UV-Vis spectra of the R6G molecules diluted in water with different concentration

**Figure S6**

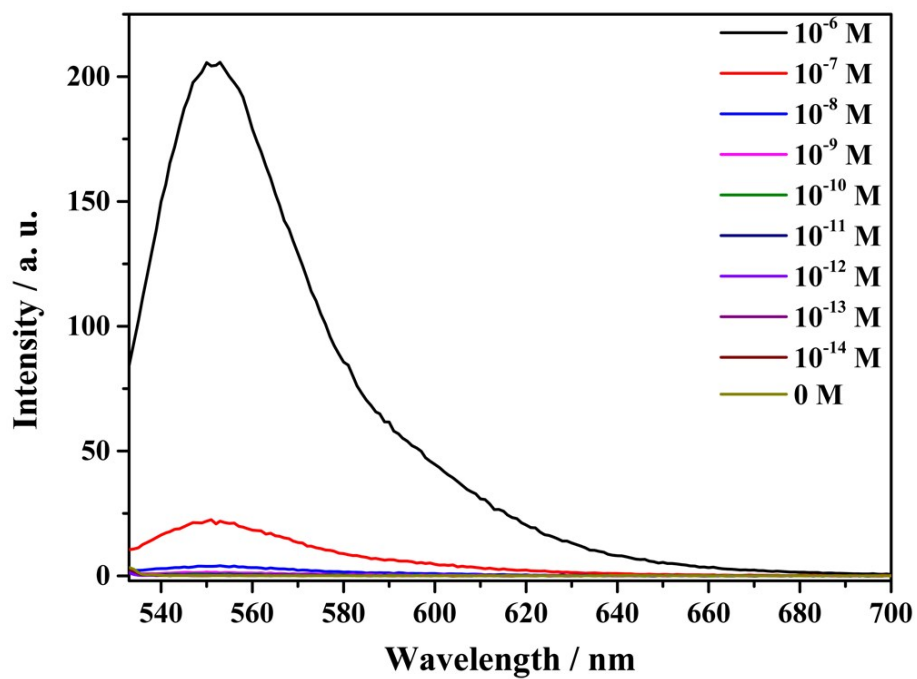

**Figure S6.** The UV-Vis spectra of the R6G molecules diluted in water with different concentration



**Figure S7**

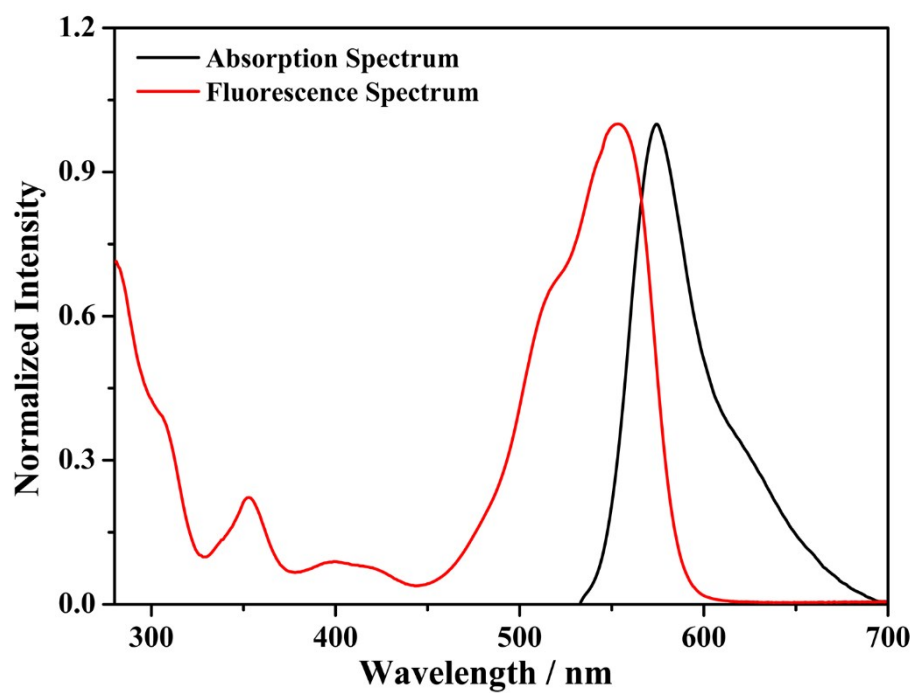

**Figure S7. Absorption and fluorescence spectra (B) of RhB molecule.**

**Figure S8**

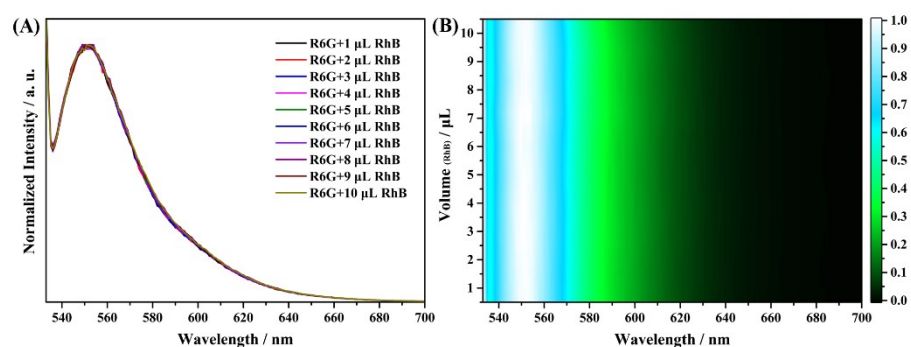

**Figure S8.** Fluorescence spectra of 100  $\mu\text{L}$  R6G mixed with different volume of RhB from 1 to 10  $\mu\text{L}$  in liquid (A) and fluorescence mapping analysis of the mixture components.
